# Supplementary material for: Facile topochemically prepared hierarchical Ni–Fe LDH nanoflowers for the electrochemical oxygen elution reaction
Source: Royal Society of Chemistry journal article supplement (doi:10.1039/d3nj02039h), 2023-01-01
Supplement: d3nj02039h1.pdf [file d3nj02039h1.pdf]

## Supporting Information

### Facile Topochemical Prepared Hierarchical Ni-Fe LDH Nanoflowers for Electrochemical Oxygen Elution Reaction

Zairan Liu<sup>a</sup>, Yifei Yang<sup>a</sup>, Yuanming Deng<sup>a\*</sup>, Jiaoning Tang<sup>a</sup>

<sup>a</sup>Shenzhen Key Laboratory of Polymer Science and Technology, Guangdong  
Research, Center for Interfacial Engineering of Functional Materials, College of  
Materials Science and Engineering, Shenzhen University, Shenzhen 518060, China

\*Corresponding author: Yuanming Deng, e-mail address: [ymdeng@szu.edu.cn](mailto:ymdeng@szu.edu.cn);

Electronic Supplementary Information (ESI) available: [details of any supplementary  
information available should be included here]. See DOI: 10.1039/x0xx00000x

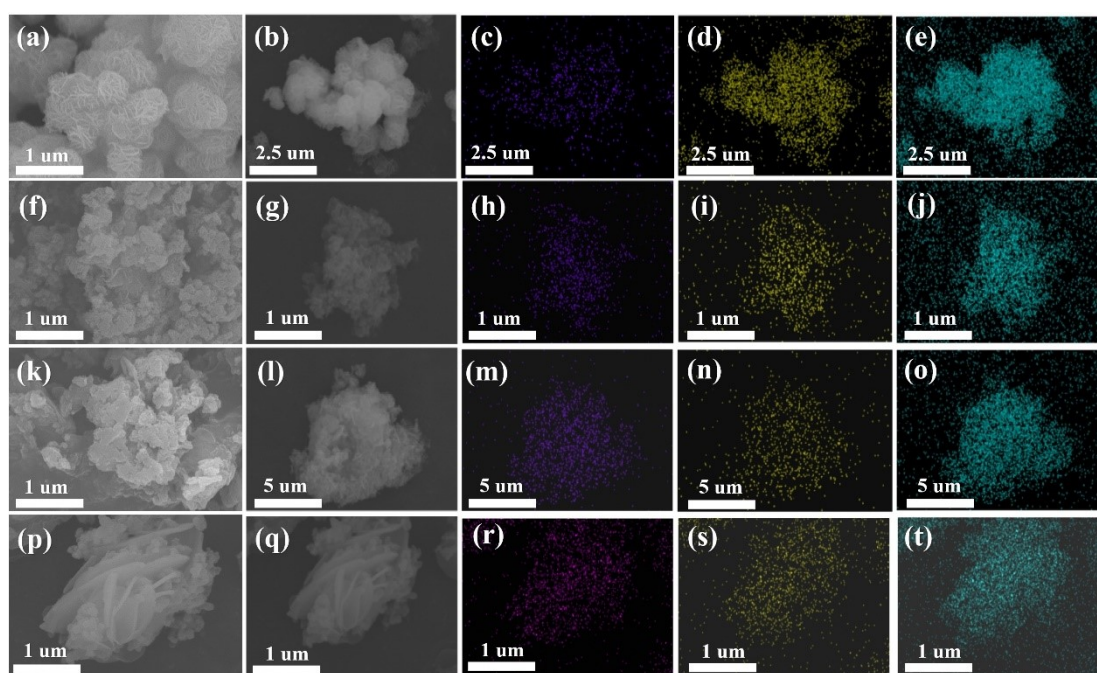

**Figure S1** morphology and EDS mapping of precipitate obtained from coprecipitation of  $\text{Ni}^{2+}$  and  $\text{Fe}^{2+}$  by amine. (a-e) trolamine, (f-j) ammonium hydroxide, (k-o) triethylamine, and (p-t) morpholine

Table S1 Chemical composition of sample obtained from amines by EDS

| Sample from amines | trolamine | ammonium hydroxide | triethylamine | morpholine |
|--------------------|-----------|--------------------|---------------|------------|
| O(wt%)             | 40.21     | 47.37              | 40.68         | 42.10      |
| Ni(wt%)            | 7.89      | 30.02              | 45.25         | 43.66      |
| Fe(wt%)            | 51.91     | 22.62              | 14.06         | 14.24      |

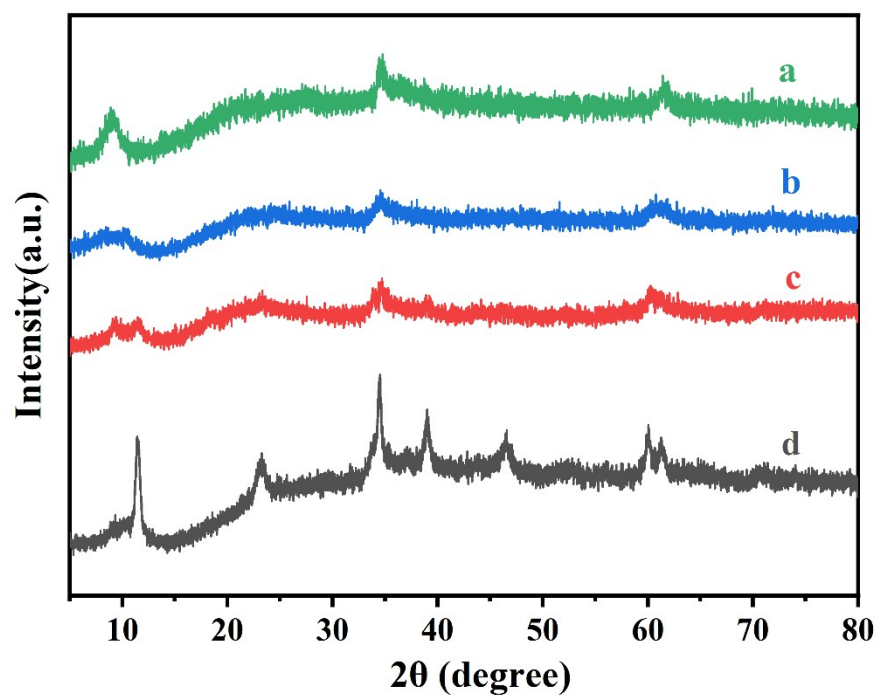

**Figure S2** XRD of precipitate obtained from coprecipitation of  $\text{Ni}^{2+}$  and  $\text{Fe}^{2+}$  by amine. (a,e) trolamine, (b, f) ammonium hydroxide, (c, g) triethylamine, and (d,h) morpholine

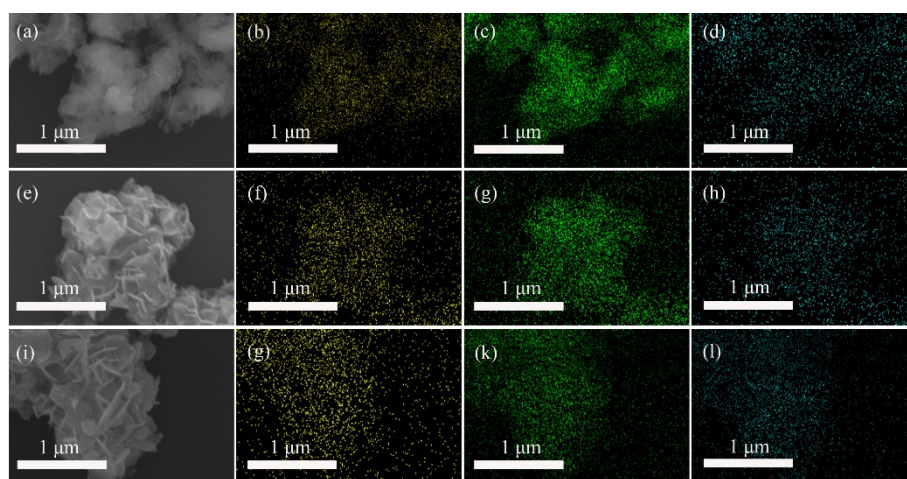

**Figure S3** EDS Mapping (a-d)  $\text{Ni}_{7.5}\text{Fe}_{2.5}$ -LDH (e-h)  $\text{Ni}_7\text{Fe}_3$ -LDH (i-l)  $\text{Ni}_5\text{Fe}_5$ -LDH

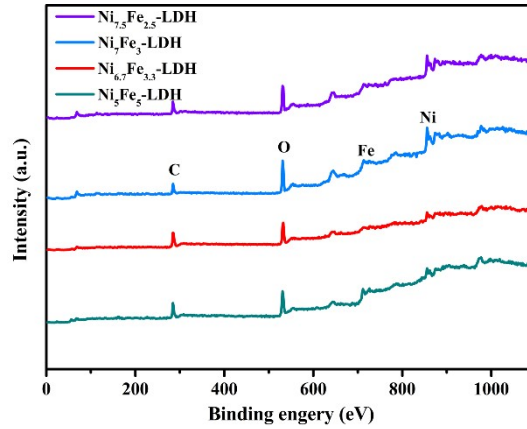

**Figure S4** The full XPS spectra of  $\text{Ni}_{7.5}\text{Fe}_{2.5}\text{-LDH}$ ,  $\text{Ni}_7\text{Fe}_3\text{-LDH}$ ,  $\text{Ni}_{6.7}\text{Fe}_{3.3}\text{-LDH}$ ,  $\text{Ni}_5\text{Fe}_5\text{-LDH}$ .

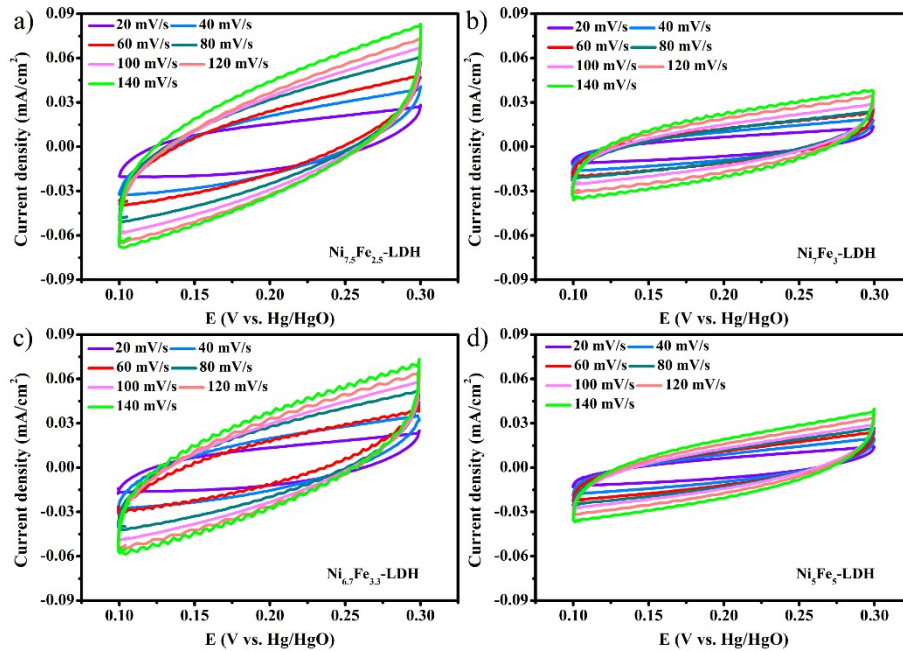

**Figure S5** Cyclic voltammograms in 1 M KOH solution measured in the non-Faradaic potential range of 0.10 V to 0.30 V vs. Hg/HgO at scan rates of  $20 \text{ mV s}^{-1}$ ,  $40 \text{ mV s}^{-1}$ ,  $60 \text{ mV s}^{-1}$ ,  $80 \text{ mV s}^{-1}$ ,  $100 \text{ mV s}^{-1}$ ,  $120 \text{ mV s}^{-1}$ ,  $140 \text{ mV s}^{-1}$ , respectively (a)  $\text{Ni}_{7.5}\text{Fe}_{2.5}\text{-LDH}$  (b)  $\text{Ni}_7\text{Fe}_3\text{-LDH}$  (c)  $\text{Ni}_{6.7}\text{Fe}_{3.3}\text{-LDH}$  (d)  $\text{Ni}_5\text{Fe}_5\text{-LDH}$

For the estimation of ECSA, a specific capacitance ( $C_s$ ) value  $C_s=0.040 \text{ mF cm}^{-2}$  in 1 M NaOH solution is adopted from a previous report[1]. Cyclic voltammograms in 1 M KOH solution measured in the non-Faradaic potential range of 0.10 V to 0.30 V at

scan rates of 20 mV s<sup>-1</sup>, 40 mV s<sup>-1</sup>, 60 mV s<sup>-1</sup>, 80 mV s<sup>-1</sup>, 100 mV s<sup>-1</sup>, 120 mV s<sup>-1</sup> 140 mV s<sup>-1</sup>, respectively. The slope obtained by  $\Delta j = (j_a - j_c)$  at different scanning speeds at 0.2 V which are twice of the electric double layer capacitor. ECSA can be estimated according to the following equation:  $ECSA = C_{dl}/C_s$  (1)

The calculation results: 9.725 cm<sup>2</sup> (Ni<sub>7.5</sub>Fe<sub>2.5</sub>-LDH), 5.575 cm<sup>2</sup> (Ni<sub>7</sub>Fe<sub>3</sub>-LDH), 8.225 cm<sup>2</sup>(Ni<sub>6.7</sub>Fe<sub>3.3</sub>-LDH), 5.075 cm<sup>2</sup>(Ni<sub>5</sub>Fe<sub>5</sub>-LDH).

## Reference

- [1] C.C.L. McCrory, S. Jung, J.C. Peters, T.F. Jaramillo, Benchmarking Heterogeneous Electrocatalysts for the Oxygen Evolution Reaction, *J. Am. Chem. Soc.*, 135 (2013) 16977-16987.
